# Supplementary material
Source: Research Square preprint supplement (doi:10.21203/rs.3.rs-9071693/v1)
Supplement: Supplementary file 1 [file 83c5b5eb9acd3bbb0e2b7419.docx]

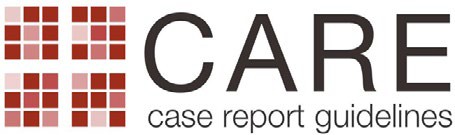

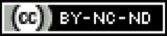

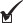
**CARE Checklist of information to include when writing a case report**

| **Topic** | **Item No** | **Checklist item description** | **Reported on Page Number/Line Number** |
| --- | --- | --- | --- |
| Title | 1 | The diagnosis or intervention of primary focus followed by the words “case report” | Page 1; Line 1 |
| Key Words | 2 | 2 to 5 key words that identify diagnoses or interventions in this case report, including "case report" | Page 2; Line 1-2 |
| Abstract  (Structured summary) | 3a | Background: state what is known and unknown; why the case report is unique and what it adds to existing literature. | Page 1; Line 3-6 |
| 3b | Case Description: describe the patient’s demographic details, main symptoms, history, important clinical findings, the main diagnosis, interventions, outcomes and follow-ups. | Page 1; Line 7-18 |
| 3c | Conclusions: summarize the main take-away lesson, clinical impact and potential implications. | Page 1; Line 19-23 |
| Introduction | 4 | One or two paragraphs summarizing why this case is unique **(may include references)** | Page 2-3 |
| Patient Information | 5a | De-identified patient specific information | Page 3; Line 13-16 |
| 5b | Primary concerns and symptoms of the patient | Page 3; Line 16-18 |
| 5c | Medical, family, and psycho-social history including relevant genetic information | Page 3; Line 18-19 |
| 5d | Relevant past interventions with outcomes | NA |
| Clinical Findings | 6 | Describe significant physical examination (PE) and important clinical findings | Page 3 |
| Timeline | 7 | Historical and current information from this episode of care organized as a timeline | NA |
| Diagnostic Assessment | 8a | Diagnostic testing (such as PE, laboratory testing, imaging, surveys). | Page 3-7 |
| 8b | Diagnostic challenges (such as access to testing, financial, or cultural) | NA |
| 8c | Diagnosis (including other diagnoses considered) | Page 3-7 |
| 8d | Prognosis (such as staging in oncology) where applicable | NA |
| Therapeutic Intervention | 9a | Types of therapeutic intervention (such as pharmacologic, surgical, preventive, self-care) | NA |
| 9b | Administration of therapeutic intervention (such as dosage, strength, duration) | NA |
| 9c | Changes in therapeutic intervention (with rationale) | NA |

| Follow-up and Outcomes | 10a | Clinician and patient-assessed outcomes (if available) | NA |
| --- | --- | --- | --- |
| 10b | Important follow-up diagnostic and other test results | NA |
| 10c | Intervention adherence and tolerability (How was this assessed?) | NA |
| 10d | Adverse and unanticipated events | NA |
| Discussion | 11a | A scientific discussion of the strengths AND limitations associated with this case report | Page 7-9 |
| 11b | Discussion of the relevant medical literature **with references** | Page 7-10 |
| 11c | The scientific rationale for any conclusions (including assessment of possible causes) | Page 10 |
| 11d | The primary “take-away” lessons of this case report (without references) in a one paragraph conclusion | Page 10 |
| Patient Perspective | 12 | The patient should share their perspective in one to two paragraphs on the treatment(s) they received | NA |
| Informed Consent | 13 | Did the patient give informed consent? Please provide if requested | **Yes** |

Please leave this space alone as it will be supplemented by the editorial office when needed.
